# Supplementary material for: Surveying the Surveyors to Address Risk Perception and Adaptive Behaviour Cross-study Comparability
Source: Copernicus journal article supplement (doi:10.5194/nhess-2021-365), 2022-02-02
Supplement: Supplementary file 1 [file nhess-2021-365-supplement.pdf]

## Risk Perception Survey of Surveyors

We would like to ask you some questions on your previous research related to risk perceptions and behaviour. The survey will take less than 10 minutes to complete, it consists of 30 closed questions, your answers will be treated anonymously and the results will be discussed with the community during our webinars.

1. Have you ever designed or implemented a study on individual perceptions of risk, e.g., a survey, interview, experiment or focus group?
2. Have you ever personally designed risk perception questionnaires?
3. Did you implement any of your studies at multiple moments across time, in order to track how risk perceptions or behaviour change over time?
4. Did you ever use a theoretical model or framework to guide the design of any of your previous studies?
5. What fields, disciplines, approaches are usually represented in your studies on risk perception or behaviour?
6. Did you ever conduct a formal test of the explanations or validity of a specific theory in a study on risk perception or behaviour?
7. Did you ever formally compare two or more theories in the same study?
8. What did you try to capture with your risk perception questions?
9. How did you select the risk perception questions?
10. *(optional, open)* What is your preferred risk perception question?
11. What kind of background context or explanatory variables do you use to explain risk perception?
12. How did you select the explanatory variables?
13. From your experience, what are the 3 more important explanatory variables? *(optional)*
14. Do you also use perception to explain behaviour?
15. How are your interviews, focus groups, or questionnaires usually designed?
16. What maximal sample size, number of interviews, respondents, participants have you used?
17. How did you choose the sample size or number of respondents?
18. Before Covid-19, what was your preferred method of administering your studies on risk perception or behaviour?
19. Has Covid-19 impacted your own research on risk perception and/or behaviour?
20. Have you ever tried to compare the results of your own studies on risk perceptions with the data from others?
21. What would be the 3 decisive questions or themes for cross-study comparability?
22. What would be the 3 important explanatory variables for cross-study comparability?
23. In which regions or countries have you carried out such investigations? *(3 possible)*
24. What type of hazards did you focus your investigations on?
25. Current country or region of employment
26. Gender
27. Working in academia, public service, consulting, emeritus, other
28. Years since PhD
29. Main field of PhD or studies
30. Number of finalized risk perception case studies  
→ End remarks *(optional)*

Link to the online survey: <https://framaforms.org/risk-perception-survey-of-surveyors-1606733327>
